# Supplementary material for: Heterogeneous catalytic activation of peroxydisulfate toward degradation of pharmaceuticals diclofenac and ibuprofen using scrap printed circuit board
Source: Royal Society of Chemistry journal article supplement (doi:10.1039/d2ra07263g), 2022-12-20
Supplement: d2ra07263g1.pdf [file d2ra07263g1.pdf]

## Supplementary Information

### **Heterogeneous catalytic activation of peroxydisulfate toward degradation of pharmaceutical diclofenac and ibuprofen using scrap printed circuit board**

**Kosar Hikmat Hama Aziz<sup>1,2,3</sup>**

*<sup>1</sup>Department of Chemistry, College of Science, University of Sulaimani, Qlyasan Street*

*Sulaimani City 46001, Kurdistan Region, Iraq*

*<sup>2</sup>Department of Medical Laboratory of Science, College of Health Sciences, University of Human*

*Development, Sulaimani, Iraq*

*\* Corresponding author's email: [kosar.hamaaziz@univsul.edu.iq](mailto:kosar.hamaaziz@univsul.edu.iq)*

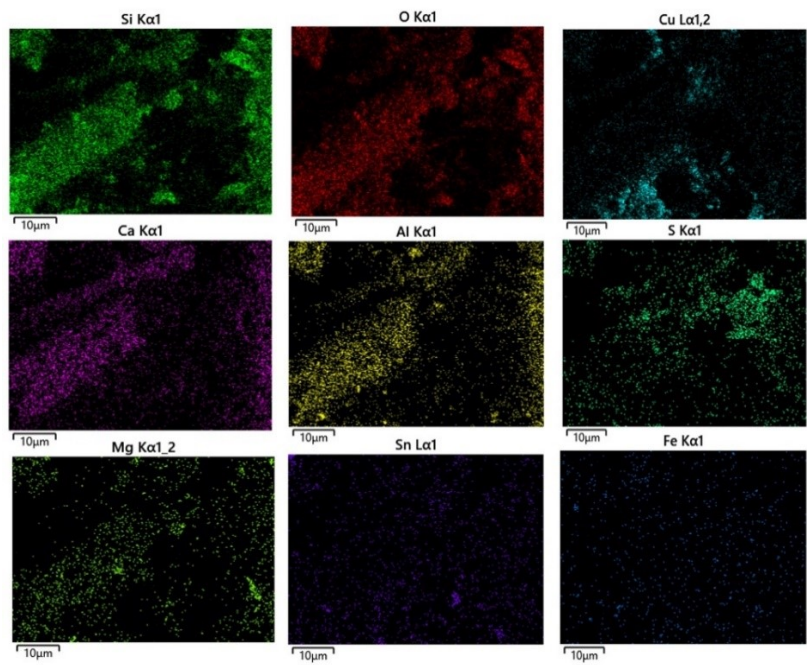

**Fig. S1. SEM-EDS elemental mapping of NCC**

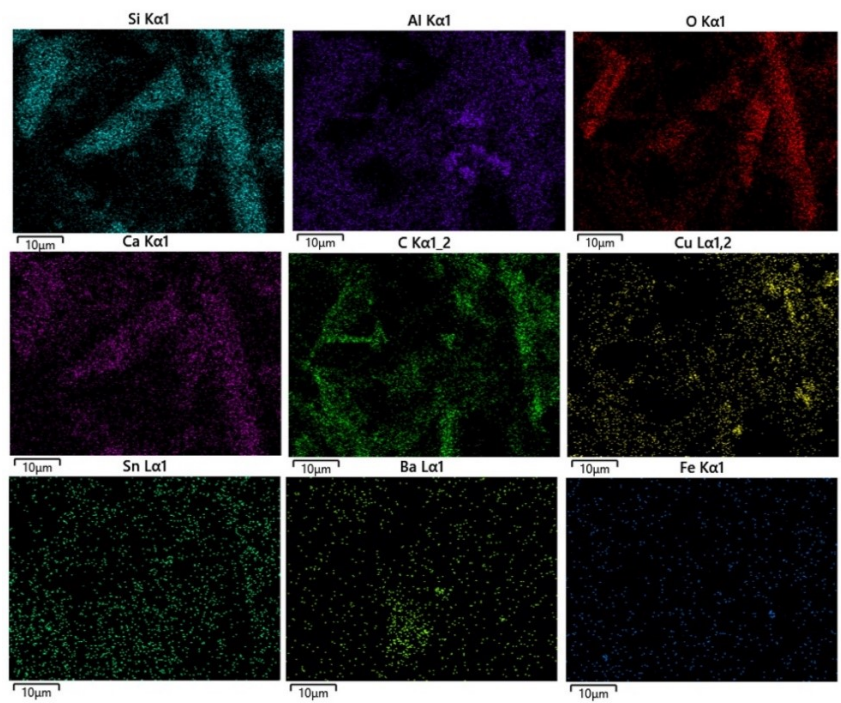

**Fig. S2. SEM-EDS elemental mapping of CC**

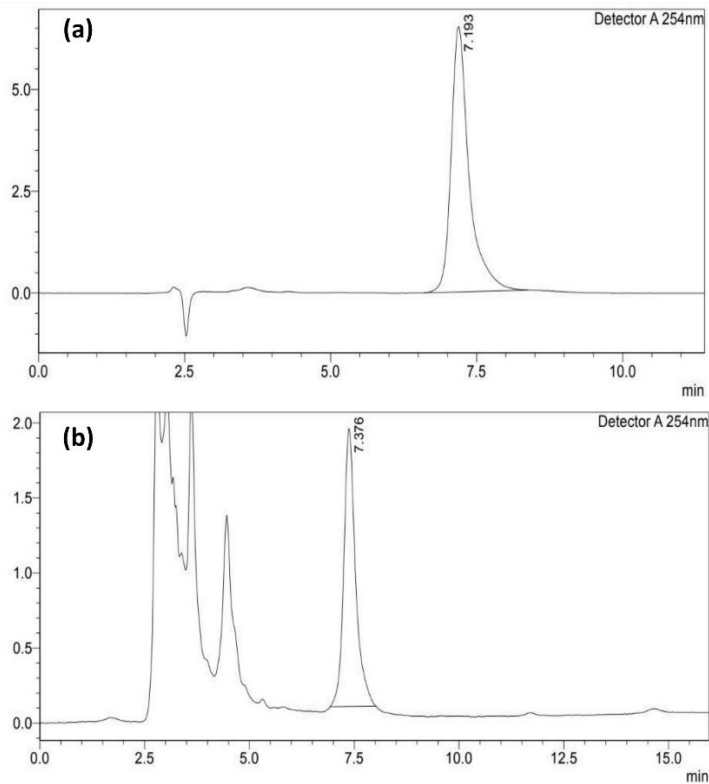

**Fig. S3. Chromatogram of DCF, (a) before degradation (b) after degradation**

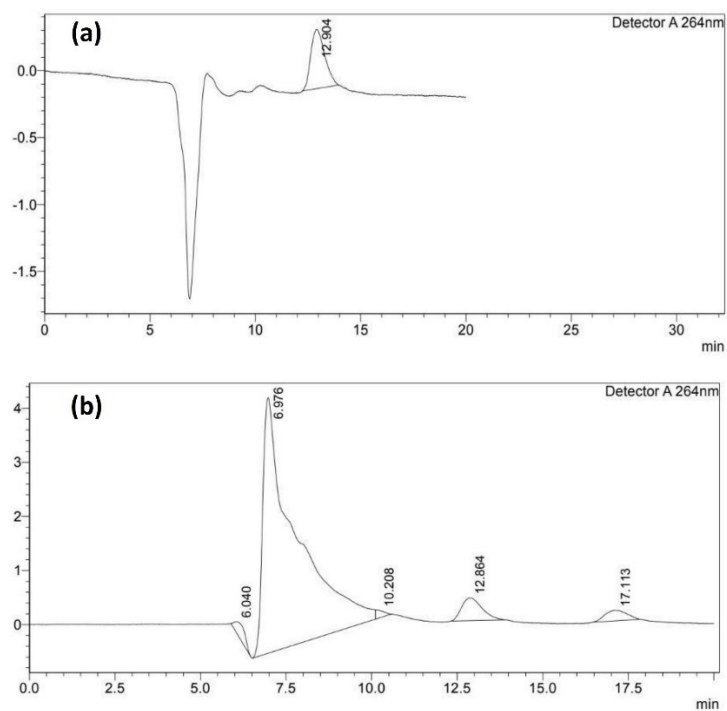

**Fig. S4. Chromatogram of IBP, (a) before degradation (b) after degradation**

**Table S1. The chemical composition of both catalysts is detailed in the XPS results.**

| C-PCB                                                                                                                      |                          |                                                                              | NC-PCB                                                                                                                                                      |                          |                                                                                             |
|----------------------------------------------------------------------------------------------------------------------------|--------------------------|------------------------------------------------------------------------------|-------------------------------------------------------------------------------------------------------------------------------------------------------------|--------------------------|---------------------------------------------------------------------------------------------|
| Element's symbol                                                                                                           | Peak binding energy (eV) | Element's state                                                              | Element's symbol                                                                                                                                            | Peak binding energy (eV) | Element's state                                                                             |
| Br(3d)                                                                                                                     | 69.08                    | CH <sub>3</sub> Br, organic Br, metal Br                                     | Si(2p)                                                                                                                                                      | 103.4                    | SiO <sub>2</sub> , metal SiO <sub>4</sub>                                                   |
| Si(2p)                                                                                                                     | 103.2                    | SiO <sub>2</sub> , metal SiO <sub>4</sub>                                    | S(2P)                                                                                                                                                       | 169.74                   | CaSO <sub>4</sub> , metal SO <sub>4</sub> , metal SO <sub>3</sub> , organic SO <sub>2</sub> |
| C(1s)                                                                                                                      | 285                      | C-C or C-H, carbonate                                                        | C(1S)                                                                                                                                                       | 285.14                   | C-C or C-H, carbonate                                                                       |
| Ca(2p)                                                                                                                     | 348.55                   | CaCO <sub>3</sub> , CaO element                                              | Ca(2p)                                                                                                                                                      | 348.08                   | CaCO <sub>3</sub> , CaO element                                                             |
| Sn(3d)                                                                                                                     | 487.06                   | SnO, SnO <sub>2</sub> element                                                | Sn(3d)                                                                                                                                                      | 486.89                   | SnO, SnO <sub>2</sub> element                                                               |
| O(1s)                                                                                                                      | 532.31                   | SiO <sub>2</sub> , metal CO <sub>3</sub> , metal oxide                       | O(1S)                                                                                                                                                       | 531.94                   | SiO <sub>2</sub> , metal CO <sub>3</sub> , metal oxide                                      |
| Fe(2p)                                                                                                                     | 716.02                   | Element                                                                      | Fe(2p)                                                                                                                                                      | 715.35                   | Fe <sub>2</sub> O <sub>3</sub> element                                                      |
| Co(2p)                                                                                                                     | 781                      | CoO, Co <sub>2</sub> O <sub>3</sub> , Co <sub>3</sub> O <sub>4</sub> element | Co(2p)                                                                                                                                                      | 780.89                   | CoO, Co <sub>2</sub> O <sub>3</sub> , Co <sub>3</sub> O <sub>4</sub> element                |
| Cu(2p)                                                                                                                     | 934.97                   | CuO element                                                                  | Cu(2p)                                                                                                                                                      | 934.4                    | CuO element                                                                                 |
| Mg(1s)                                                                                                                     | 1305.05                  | MgO element                                                                  | Mg(1s)                                                                                                                                                      | 1304.72                  | MgO element                                                                                 |
| Metal oxide (CaO, Co <sub>2</sub> O <sub>3</sub> , Co <sub>3</sub> O <sub>4</sub> , CoO, SnO, CuO, Cu <sub>2</sub> O, MgO) |                          |                                                                              | Metal oxide (CaO, Co <sub>2</sub> O <sub>3</sub> , Co <sub>3</sub> O <sub>4</sub> , CoO, SnO, CuO, Cu <sub>2</sub> O, MgO, Fe <sub>2</sub> O <sub>3</sub> ) |                          |                                                                                             |
| Elemental (Fe, Sn, Co, Mg, Cu)                                                                                             |                          |                                                                              | Elemental (Fe, Sn, Co, Mg, Cu)                                                                                                                              |                          |                                                                                             |

**Table S2: Leaching metal ions from catalysts in the treated solution**

| Time(min) | Fe(ppm) | Ba(ppm) | Ag(ppm) | Al(ppm) | Cr(ppm) | N(ppm) | Zn(ppm) |
|-----------|---------|---------|---------|---------|---------|--------|---------|
| 0         | 0       | 0       | 0       | 0       | 0       | 0      | 0       |
| 5         | L.D     | 0.479   | L.D     | L.D     | L.D     | L.D    | L.D     |
| 15        | L.D     | 0.627   | L.D     | L.D     | L.D     | L.D    | L.D     |
| 25        | 0.0215  | 0.712   | L.D     | L.D     | L.D     | L.D    | L.D     |
| 40        | 0.142   | 0.825   | L.D     | L.D     | L.D     | L.D    | L.D     |
| 55        | 0.266   | 0.952   | L.D     | L.D     | L.D     | L.D    | L.D     |
| 70        | 0.492   | 1.02    | L.D     | L.D     | L.D     | L.D    | L.D     |

## **Acknowledgments**

The author thanks the University of Sulaimani, Kurdistan-Iraq, for supporting the work and acknowledging the help of Razga Company in Kurdistan-Iraq for this research.

## **Conflicts of Interest**

The authors declare no conflict of interest.
